# Supplementary material
Source: PubMed Central journal article supplement (PMC2664526)
Supplement: NIHMS86269-supplement-1_si_001.pdf [file NIHMS86269-supplement-1_si_001.pdf]

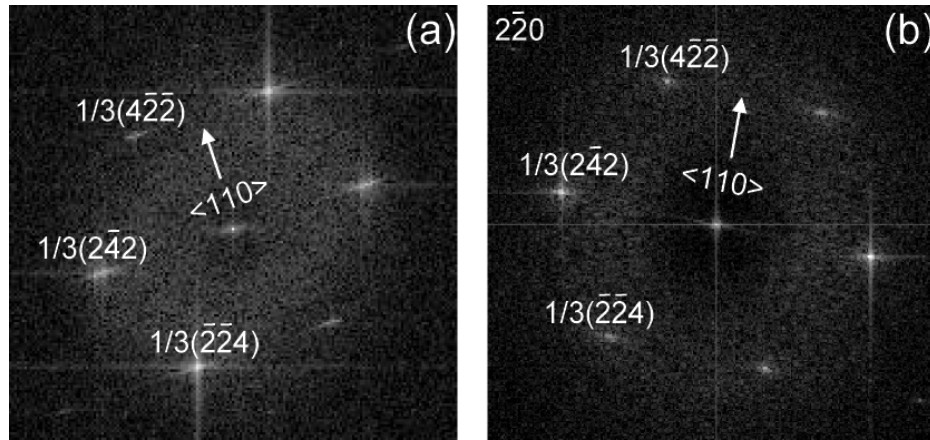

**Figure S1.** Two-dimensional Fourier transforms of the lattice images in Fig. 2b (a) and in Fig. 2c (b) depicting the [111] zone axis of the SiNWs show that the growth axes of the SiNWs are  $\langle 110 \rangle$  growth direction. The six inner peaks,  $1/3\{422\}$ , are forbidden in bulk silicon, but arise from the finite thickness of the nanowires with non-planar surface.<sup>1</sup>

1. Gibson, J. M.; Lanzerotti, M. Y.; Elser V. *Appl. Phys. Lett.* **2003**, *5*, 1710.

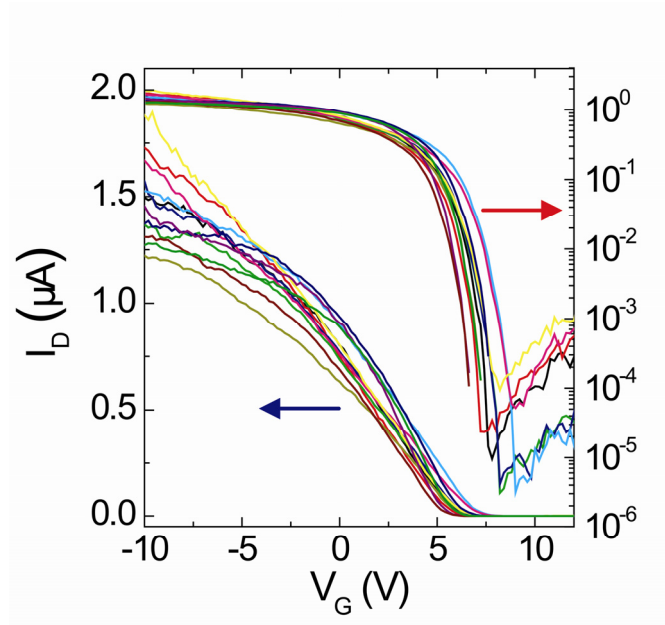

**Figure S2.** Source-drain current versus gate voltage ( $I_D$ - $V_G$ ) curves at a source-drain voltage ( $V_D$ ) of 1 V for a sampling of devices from the single-NW multiple FETs. The devices operate in a depletion (normally on) mode with a threshold voltage ( $V_{th}$ ) of 5–7 V. In addition, peak transconductance ( $G_M = dI_D/dV_G$ ) is ca. 160–270 nS with a maximum value of 360 nS. From the logarithmic plot of  $I_D$ - $V_G$ , the current on/off ratio and subthreshold slop are estimated at ca.  $10^4$ – $10^6$  and 200–500 mV/decade, respectively.
